# Supplementary material for: The Complete Mitogenomes of Three Grasshopper Species with Special Notes on the Phylogenetic Positions of Some Related Genera
Source: MDPI journal article supplement (doi:10.3390/insects14010085), 2023-01-13
Supplement: s1 [file s1]

**Table S1.** Accession numbers and references of COI sequences of *Conophyma* spp. sampled in this study.

| Species                                      | Accession number | Reference                   |
|----------------------------------------------|------------------|-----------------------------|
| <b>Caelifera, Acridoidea, Dericorythidae</b> |                  |                             |
| <b>Conophyminae</b>                          |                  |                             |
| <i>Conophyma kuznetzovi</i>                  | KC261363         | Bugrov <i>et al.</i> , 2012 |
| <i>Conophyma poimazaricum</i>                | KC261362         | Bugrov <i>et al.</i> , 2012 |
| <i>Conophyma reinigi</i>                     | KC261361         | Bugrov <i>et al.</i> , 2012 |
| <i>Conophyma semenovi</i>                    | KC261360         | Bugrov <i>et al.</i> , 2012 |
| <i>Conophyma sp.</i>                         | KX272737.        | Direct Submission           |
| <i>Conophyma sp.</i>                         | KX272738         | Direct Submission           |

#### References

- [102] Bugrov, A. G., Smyshlyaev, G. A., Blinov, A. G.. Phylogeny of grasshoppers (Orthoptera, Acrididae ) based on the analysis of DNA sequences in COI mitochondrial gene. Euroasian Entomological Journal, 2012, 11: 493–502.

**Table S2.** The best-fitting models used for phylogenetic analyses of the mitochondrial PCGs dataset.

| Information                   | Best Model  | Partition Names                                                                                                                                                                                                                         |
|-------------------------------|-------------|-----------------------------------------------------------------------------------------------------------------------------------------------------------------------------------------------------------------------------------------|
| Criterion for Model Selection |             |                                                                                                                                                                                                                                         |
| AICc                          | GTR+F+I+G4  | <i>ND3_codon2</i>                                                                                                                                                                                                                       |
|                               | GTR+F+R3    | <i>ND1_codon2</i>                                                                                                                                                                                                                       |
|                               | GTR+F+R4    | <i>ND2_codon1, ND5_codon2, ND4_codon3, COX1_codon1, ND6_codon3, COX2_codon1, ND3_codon1</i>                                                                                                                                             |
|                               | GTR+F+R5    | <i>ND5_codon3, ND4_codon1, COX1_codon3</i>                                                                                                                                                                                              |
|                               | HKY+F+R3    | <i>CYTB_codon2, COX3_codon2</i>                                                                                                                                                                                                         |
|                               | HKY+F+R4    | <i>ND4L_codon1</i>                                                                                                                                                                                                                      |
|                               | TIM2+F+R3   | <i>COX3_codon1, ND3_codon3</i>                                                                                                                                                                                                          |
|                               | TIM2+F+R4   | <i>ND1_codon3, CYTB_codon1, ATP6_codon1, ND6_codon2, ND5_codon1</i>                                                                                                                                                                     |
|                               | TIM3+F+I+G4 | <i>ATP8_codon3, ATP8_codon2</i>                                                                                                                                                                                                         |
|                               | TIM3+F+R2   | <i>ATP6_codon2</i>                                                                                                                                                                                                                      |
|                               | TIM3+F+R3   | <i>COX1_codon2, ND4L_codon2</i>                                                                                                                                                                                                         |
|                               | TIM3+F+R4   | <i>COX2_codon3, ND2_codon2</i>                                                                                                                                                                                                          |
|                               | TN+F+R3     | <i>ND6_codon1</i>                                                                                                                                                                                                                       |
|                               | TN+F+R4     | <i>ND2_codon3</i>                                                                                                                                                                                                                       |
|                               | TN+F+R5     | <i>CYTB_codon3</i>                                                                                                                                                                                                                      |
|                               | TPM2u+F+R4  | <i>ND1_codon1</i>                                                                                                                                                                                                                       |
|                               | TPM2u+F+R5  | <i>ATP6_codon3</i>                                                                                                                                                                                                                      |
|                               | TVM+F+I+G4  | <i>ATP8_codon1</i>                                                                                                                                                                                                                      |
|                               | TVM+F+R3    | <i>COX2_codon2, ND4L_codon3</i>                                                                                                                                                                                                         |
|                               | TVM+F+R4    | <i>ND4_codon2, COX3_codon3</i>                                                                                                                                                                                                          |
| BIC                           | GTR+F+G4    | <i>ND1_codon1, ND6_codon3, COX3_codon3, COX3_codon1, ND6_codon1, ND4_codon1, ND6_codon2, ND4L_codon3, ND4L_codon2, ND5_codon1</i>                                                                                                       |
|                               | GTR+F+I+G4  | <i>ND2_codon1, ND4_codon2, ND4_codon3, ND5_codon2, ND2_codon3, ND1_codon3, ND2_codon2, COX1_codon1, COX2_codon1, ATP6_codon1, COX1_codon3, COX1_codon2, CYTB_codon1, COX2_codon2, ATP6_codon2, ND3_codon1, ATP8_codon2, ATP8_codon1</i> |
|                               | HKY+F+G4    | <i>ND3_codon3, ND4L_codon1, ATP8_codon3</i>                                                                                                                                                                                             |
|                               | HKY+F+I+G4  | <i>ND5_codon3, COX2_codon3, ND1_codon2, CYTB_codon3, ATP6_codon3, CYTB_codon2, COX3_codon2, ND3_codon2</i>                                                                                                                              |
|                               |             |                                                                                                                                                                                                                                         |

**Table S3.** The best–fitting models used for the phylogenetic analyses of the partial *COX1* dataset.

| Information Criterion for<br>Model Selection | Best Model | Partition Names    |
|----------------------------------------------|------------|--------------------|
| AICc                                         | SYM+I+G4   | <i>COX1_codon1</i> |
|                                              | TN+F+R6    | <i>COX1_codon2</i> |
|                                              | TPM2u+F+R4 | <i>COX1_codon3</i> |
| BIC                                          | SYM+I+G4   | <i>COX1_codon1</i> |
|                                              | GTR+F+I+G4 | <i>COX1_codon2</i> |
|                                              | HKY+F+G4   | <i>COX1_codon3</i> |

**Table S4.** Nucleotide composition of the mitogenome of *Longzhouacris mirabilis* (mt1825).

| Feature                | Length(bp) | T%   | C%   | A%   | G%   | A+T% | AT-skew | GC-skew |
|------------------------|------------|------|------|------|------|------|---------|---------|
| Whole genome           | 16164      | 32.9 | 14.2 | 42.3 | 10.5 | 75.2 | 0.1250  | -0.1498 |
| Protein-coding genes   | 11148      | 32.4 | 14.4 | 42.0 | 11.1 | 74.4 | 0.1290  | -0.1294 |
| First codon position   | 3716       | 29.8 | 11.4 | 45.8 | 13.0 | 75.6 | 0.2116  | 0.0656  |
| Second codon position  | 3716       | 34.5 | 19.5 | 31.1 | 14.9 | 65.6 | -0.0518 | -0.1337 |
| Third codon position   | 3716       | 33.0 | 12.3 | 49.2 | 5.5  | 82.2 | 0.1971  | -0.3820 |
| Protein-coding genes-J | 6864       | 37.0 | 14.7 | 36.2 | 12.1 | 73.2 | -0.0109 | -0.0970 |
| First codon position   | 2288       | 30.0 | 13.8 | 36.7 | 19.4 | 66.7 | 0.1004  | 0.1687  |
| Second codon position  | 2288       | 44.2 | 21.9 | 20.1 | 13.7 | 64.3 | -0.3748 | -0.2303 |
| Third codon position   | 2288       | 36.6 | 8.4  | 51.7 | 3.2  | 88.3 | 0.1710  | -0.4483 |
| Protein-coding genes-N | 4284       | 25.2 | 13.9 | 51.4 | 9.5  | 76.6 | 0.3420  | -0.1880 |
| First codon position   | 1428       | 29.4 | 7.5  | 60.4 | 2.7  | 89.8 | 0.3452  | -0.4706 |
| Second codon position  | 1428       | 19.0 | 15.5 | 48.7 | 16.7 | 67.7 | 0.4387  | 0.0373  |
| Third codon position   | 1428       | 27.2 | 18.6 | 45.1 | 9.1  | 72.3 | 0.2476  | -0.3430 |
| ATP6                   | 678        | 38.2 | 14.6 | 37.9 | 9.3  | 76.1 | -0.0039 | -0.2218 |
| ATP8                   | 159        | 38.4 | 13.8 | 42.8 | 5.0  | 81.2 | 0.0542  | -0.4681 |
| COX1                   | 1540       | 34.7 | 16.7 | 33.8 | 14.8 | 68.5 | -0.0131 | -0.0603 |
| COX2                   | 684        | 35.1 | 15.4 | 37.6 | 12.0 | 72.7 | 0.0344  | -0.1241 |
| COX3                   | 792        | 36.2 | 15.2 | 34.5 | 14.1 | 70.7 | -0.0240 | -0.0375 |
| CYTB                   | 1140       | 40.7 | 13.2 | 33.4 | 12.7 | 74.1 | -0.0985 | -0.0193 |
| ND1                    | 945        | 25.4 | 14.0 | 49.9 | 10.7 | 75.3 | 0.3254  | -0.1336 |
| ND2                    | 1020       | 36.3 | 14.7 | 37.9 | 11.1 | 74.2 | 0.0216  | -0.1395 |
| ND3                    | 354        | 36.2 | 14.4 | 39.0 | 10.5 | 75.2 | 0.0372  | -0.1566 |
| ND4                    | 1336       | 24.8 | 14.2 | 52.2 | 8.8  | 77.0 | 0.3558  | -0.2348 |
| ND4L                   | 294        | 21.8 | 12.2 | 57.5 | 8.5  | 79.3 | 0.4502  | -0.1787 |
| ND5                    | 1719       | 26.2 | 13.8 | 50.5 | 9.5  | 76.7 | 0.3168  | -0.1845 |
| ND6                    | 522        | 39.1 | 10.7 | 41.6 | 8.6  | 80.7 | 0.0310  | -0.1088 |
| rrnL                   | 1389       | 33.6 | 14.2 | 43.7 | 8.5  | 77.3 | 0.1307  | -0.2511 |
| rrnS                   | 792        | 31.3 | 16.5 | 42.3 | 9.8  | 73.6 | 0.1495  | -0.2548 |
| D - loop               | 1348       | 36.2 | 12.3 | 44.5 | 7.0  | 80.7 | 0.1029  | -0.2746 |

**Table S5.** Nucleotide composition of the mitogenome of *Ranacris albicornis* (mt1826).

| <b>Feature</b>         | <b>Length(bp)</b> | <b>T%</b> | <b>C%</b> | <b>A%</b> | <b>G%</b> | <b>A+T%</b> | <b>AT-skew</b> | <b>GC-skew</b> |
|------------------------|-------------------|-----------|-----------|-----------|-----------|-------------|----------------|----------------|
| Whole genome           | 15720             | 33.1      | 14.2      | 42.0      | 10.7      | 75.1        | 0.1185         | -0.1406        |
| Protein-coding genes   | 11148             | 33.1      | 14.3      | 41.6      | 11.0      | 74.7        | 0.1138         | -0.1304        |
| First codon position   | 3716              | 30.4      | 11.3      | 44.9      | 13.4      | 75.3        | 0.1926         | 0.0850         |
| Second codon position  | 3716              | 34.6      | 19.6      | 31.0      | 14.7      | 65.6        | -0.0549        | -0.1429        |
| Third codon position   | 3716              | 34.4      | 11.8      | 49.0      | 4.8       | 83.4        | 0.1751         | -0.4217        |
| Protein-coding genes-J | 6867              | 37.2      | 14.8      | 36.1      | 11.9      | 73.3        | -0.0150        | -0.1086        |
| First codon position   | 2289              | 29.0      | 14.7      | 36.3      | 20.1      | 65.3        | 0.1118         | 0.1552         |
| Second codon position  | 2289              | 44.3      | 22.1      | 20.4      | 13.2      | 64.7        | -0.3694        | -0.2521        |
| Third codon position   | 2289              | 38.3      | 7.6       | 51.7      | 2.5       | 90.0        | 0.1489         | -0.5050        |
| Protein-coding genes-N | 4281              | 26.7      | 13.4      | 50.5      | 9.4       | 77.2        | 0.3083         | -0.1754        |
| First codon position   | 1427              | 32.7      | 5.9       | 58.7      | 2.7       | 91.4        | 0.2845         | -0.3721        |
| Second codon position  | 1427              | 19.2      | 15.6      | 48.1      | 17.2      | 67.3        | 0.4294         | 0.0488         |
| Third codon position   | 1427              | 28.2      | 18.7      | 44.7      | 8.4       | 72.9        | 0.2263         | -0.3801        |
| ATP6                   | 678               | 37.3      | 15.3      | 38.2      | 9.1       | 75.5        | 0.0119         | -0.2541        |
| ATP8                   | 162               | 37.7      | 13.6      | 44.4      | 4.3       | 82.1        | 0.0816         | -0.5196        |
| COX1                   | 1540              | 35.5      | 15.9      | 33.4      | 15.1      | 68.9        | -0.0305        | -0.0258        |
| COX2                   | 684               | 35.1      | 14.2      | 37.6      | 13.2      | 72.7        | 0.0344         | -0.0365        |
| COX3                   | 792               | 36.7      | 15.5      | 33.6      | 14.1      | 70.3        | -0.0441        | -0.0473        |
| CYTB                   | 1137              | 40.7      | 13.5      | 33.7      | 12.1      | 74.4        | -0.0941        | -0.0547        |
| ND1                    | 945               | 26.3      | 13.2      | 49.6      | 10.8      | 75.9        | 0.3070         | -0.1000        |
| ND2                    | 1023              | 35.0      | 16.4      | 38.3      | 10.3      | 73.3        | 0.0450         | -0.2285        |
| ND3                    | 354               | 36.4      | 15.5      | 38.1      | 9.9       | 74.5        | 0.0228         | -0.2205        |
| ND4                    | 1335              | 26.7      | 13.9      | 50.5      | 8.8       | 77.2        | 0.3083         | -0.2247        |
| ND4L                   | 294               | 22.8      | 11.2      | 56.8      | 9.2       | 79.6        | 0.4271         | -0.0980        |
| ND5                    | 1719              | 27.7      | 13.4      | 49.7      | 9.1       | 77.4        | 0.2842         | -0.1911        |
| ND6                    | 522               | 42.0      | 9.4       | 41.6      | 7.1       | 83.6        | -0.0048        | -0.1394        |
| rrnL                   | 1382              | 33.7      | 14.5      | 42.7      | 9.1       | 76.4        | 0.1178         | -0.2288        |
| rrnS                   | 806               | 32.0      | 15.9      | 41.8      | 10.3      | 73.8        | 0.1328         | -0.2137        |
| D - loop               | 860               | 31.7      | 11.7      | 49.2      | 7.3       | 80.9        | 0.2163         | -0.2316        |

**Table S6.** Nucleotide composition of the mitogenome of *Conophyma zhaosuensis* (mt1938).

| <b>Feature</b>         | <b>Length(bp)</b> | <b>T%</b> | <b>C%</b> | <b>A%</b> | <b>G%</b> | <b>A+T%</b> | <b>AT-skew</b> | <b>GC-skew</b> |
|------------------------|-------------------|-----------|-----------|-----------|-----------|-------------|----------------|----------------|
| Whole genome           | 16190             | 32.1      | 14.3      | 42.5      | 11.2      | 74.6        | 0.1394         | -0.1216        |
| Protein-coding genes   | 11175             | 42.3      | 12.8      | 31.9      | 13.1      | 74.2        | -0.1402        | 0.0116         |
| First codon position   | 5397              | 30.3      | 15        | 41.7      | 13        | 72          | 0.1583         | -0.0714        |
| Second codon position  | 5397              | 32.5      | 14.3      | 43.2      | 9.9       | 75.7        | 0.1413         | -0.1818        |
| Third codon position   | 5396              | 33.4      | 13.5      | 42.5      | 10.6      | 75.9        | 0.1199         | -0.1203        |
| Protein-coding genes-J | 6880              | 36.9      | 14.6      | 35.8      | 12.7      | 72.7        | -0.0151        | -0.0696        |
| First codon position   | 2294              | 35.8      | 11.5      | 41.7      | 11        | 77.5        | 0.0761         | -0.0222        |
| Second codon position  | 2293              | 36.1      | 17.2      | 30.2      | 16.5      | 66.3        | -0.0890        | -0.0208        |
| Third codon position   | 2293              | 38.8      | 15.2      | 35.4      | 10.6      | 74.2        | -0.0458        | -0.1783        |
| Protein-coding genes-N | 4295              | 50.8      | 9.8       | 25.7      | 13.7      | 76.5        | -0.3281        | 0.1660         |
| First codon position   | 1432              | 52.7      | 6.6       | 28.6      | 12.1      | 81.3        | -0.2964        | 0.2941         |
| Second codon position  | 1432              | 45.5      | 12.8      | 23.6      | 18.1      | 69.1        | -0.3169        | 0.1715         |
| Third codon position   | 1431              | 54.2      | 9.9       | 25        | 10.9      | 79.2        | -0.3687        | 0.0481         |
| ATP6                   | 678               | 38.3      | 14.3      | 38.2      | 9.1       | 76.5        | -0.0013        | -0.2222        |
| ATP8                   | 162               | 36.4      | 12.3      | 46.9      | 4.3       | 83.3        | 0.1261         | -0.4819        |
| COX1                   | 1531              | 35.6      | 15.8      | 32.9      | 15.7      | 68.5        | -0.0394        | -0.0032        |
| COX2                   | 684               | 33        | 15.1      | 37.9      | 14        | 70.9        | 0.0691         | -0.0378        |
| COX3                   | 792               | 37.4      | 15.8      | 31.8      | 15        | 69.2        | -0.0809        | -0.0260        |
| CYTB                   | 1137              | 38.2      | 14.7      | 33.9      | 13.2      | 72.1        | -0.0596        | -0.0538        |
| ND1                    | 945               | 25.2      | 13.5      | 50.9      | 10.4      | 76.1        | 0.3377         | -0.1297        |
| ND2                    | 1021              | 36        | 15.2      | 37.1      | 11.7      | 73.1        | 0.0150         | -0.1301        |
| ND3                    | 354               | 37.3      | 13.3      | 37.6      | 11.9      | 74.9        | 0.0040         | -0.0556        |
| ND4                    | 1339              | 24.8      | 15        | 50        | 10.2      | 74.8        | 0.3369         | -0.1905        |
| ND4L                   | 294               | 20.7      | 12.2      | 58.2      | 8.8       | 78.9        | 0.4753         | -0.1619        |
| ND5                    | 1717              | 27.6      | 13        | 50.1      | 9.3       | 77.7        | 0.2896         | -0.1659        |
| ND6                    | 521               | 42.2      | 9.6       | 40.7      | 7.5       | 82.9        | -0.0181        | -0.1228        |
| rrnL                   | 1365              | 32.1      | 14.4      | 45        | 8.6       | 77.1        | 0.1673         | -0.2522        |
| rrnS                   | 796               | 31.2      | 16.7      | 40.8      | 11.3      | 72          | 0.1333         | -0.1929        |
| D - loop               | 1437              | 24.6      | 11.4      | 47        | 8.1       | 71.6        | 0.3128         | -0.1692        |

**Table S7.** Codon usage of the PCGs of *Longzhouacris mirabilis* (mt1825).

| Amino Acid | Codon | No. | RSCU(%) | Amino Acid | Codon | No. | RSCU(%) |
|------------|-------|-----|---------|------------|-------|-----|---------|
| Phe        | UUU   | 313 | 1.58    | Tyr        | UAU   | 194 | 1.79    |
|            | UUC   | 84  | 0.42    |            | UAC   | 23  | 0.21    |
| Leu        | UUA   | 336 | 4.30    | End        | UAA   | 37  | 1.48    |
|            | UUG   | 36  | 0.46    |            | UAG   | 13  | 0.52    |
| Leu        | CUU   | 42  | 0.54    | His        | CAU   | 52  | 1.58    |
|            | CUC   | 7   | 0.09    |            | CAC   | 14  | 0.42    |
|            | CUA   | 42  | 0.54    | Gln        | CAA   | 52  | 1.82    |
|            | CUG   | 6   | 0.08    |            | CAG   | 5   | 0.18    |
| Ile        | AUU   | 326 | 1.73    | Asn        | AAU   | 177 | 1.60    |
|            | AUC   | 51  | 0.27    |            | AAC   | 44  | 0.40    |
| Met        | AUA   | 190 | 1.72    | Lys        | AAA   | 64  | 1.31    |
|            | AUG   | 31  | 0.28    |            | AAG   | 34  | 0.69    |
| Val        | GUU   | 65  | 1.68    | Asp        | GAU   | 54  | 1.74    |
|            | GUC   | 9   | 0.23    |            | GAC   | 8   | 0.26    |
|            | GUA   | 74  | 1.91    | Glu        | GAA   | 64  | 1.71    |
|            | GUG   | 7   | 0.18    |            | GAG   | 11  | 0.29    |
| Ser        | UCU   | 84  | 1.85    | Cys        | UGU   | 55  | 1.62    |
|            | UCC   | 24  | 0.53    |            | UGC   | 13  | 0.38    |
|            | UCA   | 115 | 2.53    | Trp        | UGA   | 95  | 1.41    |
|            | UCG   | 9   | 0.20    |            | UGG   | 40  | 0.59    |
| Pro        | CCU   | 56  | 1.75    | Arg        | CGU   | 15  | 1.22    |
|            | CCC   | 12  | 0.38    |            | CGC   | 1   | 0.08    |
|            | CCA   | 56  | 1.75    |            | CGA   | 31  | 2.53    |
|            | CCG   | 4   | 0.13    |            | CGG   | 2   | 0.16    |
| Thr        | ACU   | 62  | 1.34    | Ser        | AGU   | 34  | 0.75    |
|            | ACC   | 27  | 0.58    |            | AGC   | 15  | 0.33    |
|            | ACA   | 92  | 1.99    |            | AGA   | 67  | 1.48    |
|            | ACG   | 4   | 0.09    |            | AGG   | 15  | 0.33    |
| Ala        | GCU   | 47  | 1.49    | Gly        | GGU   | 71  | 1.46    |
|            | GCC   | 8   | 0.25    |            | GGC   | 9   | 0.18    |
|            | GCA   | 71  | 2.25    |            | GGA   | 97  | 1.99    |
|            | GCG   | 0   | 0.00    |            | GGG   | 18  | 0.37    |

**Table S8.** Codon usage of the PCGs of *Ranacris albicornis* (mt1826).

| Amino Acid | Codon | No. | RSCU(%) | Amino Acid | Codon | No. | RSCU(%) |
|------------|-------|-----|---------|------------|-------|-----|---------|
| Phe        | UUU   | 285 | 1.75    | Tyr        | UAU   | 165 | 1.86    |
|            | UUC   | 41  | 0.25    |            | UAC   | 12  | 0.14    |
| Leu        | UUA   | 375 | 4.23    | End        | UAA   | 0   | 0       |
|            | UUG   | 27  | 0.3     |            | UAG   | 0   | 0       |
| Leu        | CUU   | 66  | 0.74    | His        | CAU   | 54  | 1.59    |
|            | CUC   | 5   | 0.06    |            | CAC   | 14  | 0.41    |
|            | CUA   | 53  | 0.6     | Gln        | CAA   | 61  | 1.88    |
|            | CUG   | 6   | 0.07    |            | CAG   | 4   | 0.12    |
| Ile        | AUU   | 358 | 1.86    | Asn        | AAU   | 141 | 1.67    |
|            | AUC   | 26  | 0.14    |            | AAC   | 28  | 0.33    |
| Met        | AUA   | 250 | 1.84    | Lys        | AAA   | 81  | 1.56    |
|            | AUG   | 22  | 0.16    |            | AAG   | 23  | 0.44    |
| Val        | GUU   | 86  | 1.86    | Asp        | GAU   | 63  | 1.7     |
|            | GUC   | 9   | 0.19    |            | GAC   | 11  | 0.3     |
|            | GUA   | 85  | 1.84    | Glu        | GAA   | 70  | 1.69    |
|            | GUG   | 5   | 0.11    |            | GAG   | 13  | 0.31    |
| Ser        | UCU   | 110 | 2.46    | Cys        | UGU   | 42  | 1.91    |
|            | UCC   | 12  | 0.27    |            | UGC   | 2   | 0.09    |
|            | UCA   | 126 | 2.82    | Trp        | UGA   | 92  | 1.82    |
|            | UCG   | 3   | 0.07    |            | UGG   | 9   | 0.18    |
| Pro        | CCU   | 59  | 1.71    | Arg        | CGU   | 17  | 1.24    |
|            | CCC   | 12  | 0.35    |            | CGC   | 1   | 0.07    |
|            | CCA   | 63  | 1.83    |            | CGA   | 34  | 2.47    |
|            | CCG   | 4   | 0.12    |            | CGG   | 3   | 0.22    |
| Thr        | ACU   | 66  | 1.34    | Ser        | AGU   | 23  | 0.51    |
|            | ACC   | 18  | 0.37    |            | AGC   | 1   | 0.02    |
|            | ACA   | 110 | 2.23    |            | AGA   | 82  | 1.83    |
|            | ACG   | 3   | 0.06    |            | AGG   | 1   | 0.02    |
| Ala        | GCU   | 75  | 1.81    | Gly        | GGU   | 103 | 1.89    |
|            | GCC   | 14  | 0.34    |            | GGC   | 6   | 0.11    |
|            | GCA   | 76  | 1.83    |            | GGA   | 92  | 1.69    |
|            | GCG   | 1   | 0.02    |            | GGG   | 17  | 0.31    |



**Table S9.** Codon usage of the PCGs of *Conophyma zhaosuensis* (mt1938).

| Amino Acid | Codon | No. | RSCU(%) | Amino Acid | Codon | No. | RSCU(%) |
|------------|-------|-----|---------|------------|-------|-----|---------|
| Phe        | UUU   | 316 | 1.54    | Tyr        | UAU   | 155 | 1.7     |
|            | UUC   | 95  | 0.46    |            | UAC   | 27  | 0.3     |
| Leu        | UUA   | 337 | 4.03    | End        | UAA   | 19  | 1.06    |
|            | UUG   | 46  | 0.55    |            | UAG   | 17  | 0.94    |
| Leu        | CUU   | 59  | 0.71    | His        | CAU   | 52  | 1.53    |
|            | CUC   | 10  | 0.12    |            | CAC   | 16  | 0.47    |
|            | CUA   | 48  | 0.57    | Gln        | CAA   | 59  | 1.87    |
|            | CUG   | 2   | 0.02    |            | CAG   | 4   | 0.13    |
| Ile        | AUU   | 325 | 1.81    | Asn        | AAU   | 173 | 1.67    |
|            | AUC   | 35  | 0.19    |            | AAC   | 34  | 0.33    |
| Met        | AUA   | 183 | 1.69    | Lys        | AAA   | 73  | 1.4     |
|            | AUG   | 34  | 0.31    |            | AAG   | 31  | 0.6     |
| Val        | GUU   | 83  | 1.98    | Asp        | GAU   | 54  | 1.66    |
|            | GUC   | 5   | 0.12    |            | GAC   | 11  | 0.34    |
|            | GUA   | 77  | 1.83    | Glu        | GAA   | 65  | 1.86    |
|            | GUG   | 3   | 0.07    |            | GAG   | 5   | 0.14    |
| Ser        | UCU   | 80  | 1.84    | Cys        | UGU   | 46  | 1.39    |
|            | UCC   | 15  | 0.35    |            | UGC   | 20  | 0.61    |
|            | UCA   | 117 | 2.7     | Trp        | UGA   | 99  | 1.51    |
| Pro        | UCG   | 10  | 0.23    |            | UGG   | 32  | 0.49    |
|            | CCU   | 54  | 1.74    | Arg        | CGU   | 14  | 1.12    |
|            | CCC   | 7   | 0.23    |            | CGC   | 0   | 0       |
|            | CCA   | 62  | 2       |            | CGA   | 34  | 2.72    |
| Thr        | CCG   | 1   | 0.03    |            | CGG   | 2   | 0.16    |
|            | ACU   | 53  | 1.11    | Ser        | AGU   | 28  | 0.65    |
|            | ACC   | 15  | 0.31    |            | AGC   | 9   | 0.21    |
|            | ACA   | 116 | 2.43    |            | AGA   | 74  | 1.71    |
| Ala        | ACG   | 7   | 0.15    | Gly        | AGG   | 14  | 0.32    |
|            | GCU   | 63  | 1.66    |            | GGU   | 64  | 1.28    |
|            | GCC   | 8   | 0.21    |            | GGC   | 6   | 0.12    |
|            | GCA   | 80  | 2.11    |            | GGA   | 107 | 2.14    |
|            | GCG   | 1   | 0.03    |            | GGG   | 23  | 0.46    |

**Table S10.** Annotation of the three newly sequenced complete mitogenomes.

| Name        | Type        | Direction | Integenic nucleotides |        |        | Length |        |        |
|-------------|-------------|-----------|-----------------------|--------|--------|--------|--------|--------|
|             |             |           | mt1825                | mt1826 | mt1938 | mt1825 | mt1826 | mt1938 |
| <b>trnI</b> | <b>tRNA</b> | forward   | 0                     | 3      | 4      | 66     | 66     | 65     |
| trnQ        | tRNA        | reverse   | -1                    | 10     | 7      | 69     | 69     | 69     |
| trnM        | tRNA        | forward   | 0                     | 0      | 0      | 68     | 69     | 69     |
| ND2         | CDS         | forward   | -2                    | -2     | 0      | 1020   | 1023   | 1021   |
| trnW        | tRNA        | forward   | -8                    | -8     | -8     | 69     | 66     | 68     |
| trnC        | tRNA        | reverse   | 9                     | 5      | 7      | 64     | 68     | 63     |
| trnY        | tRNA        | reverse   | -8                    | -8     | 1      | 65     | 65     | 65     |
| COX1        | CDS         | forward   | 0                     | 0      | 0      | 1540   | 1540   | 1531   |
| trnL2       | tRNA        | forward   | 10                    | 7      | 7      | 66     | 66     | 66     |
| COX2        | CDS         | forward   | -2                    | -2     | -2     | 684    | 684    | 684    |
| trnD        | tRNA        | forward   | 2                     | 2      | 2      | 63     | 63     | 65     |
| trnK        | tRNA        | forward   | 14                    | 18     | -16    | 71     | 71     | 101    |
| ATP8        | CDS         | forward   | -7                    | -7     | -7     | 159    | 162    | 162    |
| ATP6        | CDS         | forward   | 4                     | 3      | 4      | 678    | 678    | 678    |
| COX3        | CDS         | forward   | 6                     | 2      | 2      | 792    | 792    | 792    |
| trnG        | tRNA        | forward   | 0                     | 0      | 0      | 65     | 64     | 67     |
| ND3         | CDS         | forward   | 0                     | -1     | -1     | 354    | 354    | 354    |
| trnA        | tRNA        | forward   | 1                     | 5      | 4      | 66     | 65     | 66     |
| trnR        | tRNA        | forward   | 5                     | 6      | 0      | 68     | 66     | 64     |
| trnN        | tRNA        | forward   | 0                     | 0      | 0      | 65     | 65     | 69     |
| trnS1       | tRNA        | forward   | 2                     | 0      | 2      | 66     | 65     | 67     |
| trnE        | tRNA        | forward   | -1                    | 0      | -27    | 69     | 66     | 93     |
| trnF        | tRNA        | reverse   | 0                     | 2      | 1      | 65     | 64     | 66     |
| ND5         | CDS         | reverse   | 15                    | 15     | 15     | 1719   | 1719   | 1717   |
| trnH        | tRNA        | reverse   | 3                     | 4      | -1     | 67     | 68     | 66     |
| ND4         | CDS         | reverse   | -7                    | -7     | -7     | 1336   | 1335   | 1339   |
| ND4L        | CDS         | reverse   | 2                     | 2      | 2      | 294    | 294    | 294    |
| trnT        | tRNA        | forward   | 0                     | 0      | 0      | 66     | 70     | 69     |
| trnP        | tRNA        | reverse   | 2                     | 2      | 2      | 63     | 65     | 64     |
| ND6         | CDS         | forward   | 8                     | 3      | 8      | 522    | 522    | 521    |
| CYTB        | CDS         | forward   | -5                    | 10     | 8      | 1140   | 1137   | 1140   |
| trnS2       | tRNA        | forward   | 21                    | 19     | 21     | 69     | 70     | 70     |
| ND1         | CDS         | reverse   | 3                     | 3      | 3      | 945    | 945    | 945    |
| trnL1       | tRNA        | reverse   | -59                   | -50    | -42    | 65     | 64     | 66     |
| rrnL        | rRNA        | reverse   | -19                   | -19    | -3     | 1389   | 1382   | 1365   |
| trnV        | tRNA        | reverse   | 1                     | 1      | 2      | 71     | 71     | 71     |
| rrnS        | rRNA        | reverse   | 0                     | 3      | 29     | 792    | 806    | 796    |
| A+T         | unsure      | forward   |                       |        |        | 1348   | 860    | 1437   |
